# Supplementary material for: Photoenhanced sulfates formation by the heterogeneous uptake of SO 2 on non-photoactive mineral dust
Source: Copernicus journal article supplement (doi:10.5194/egusphere-2023-1273), 2023-10-20
Supplement: Supplementary file 1 [file egusphere-2023-1273-supplement.pdf]

*Supplement of*

**Photoenhanced sulfates formation by the heterogeneous uptake of SO<sub>2</sub> on non-photoactive mineral dust**

Chong Han\*, Jiawei Ma, Wangjin Yang, Hongxing Yang

School of Metallurgy, Northeastern University, Shenyang, 110819, China

\*Address correspondence to author: hanch@smm.neu.edu.cn

**This file includes:**

Figures S1-S11

Tables S1

SI References

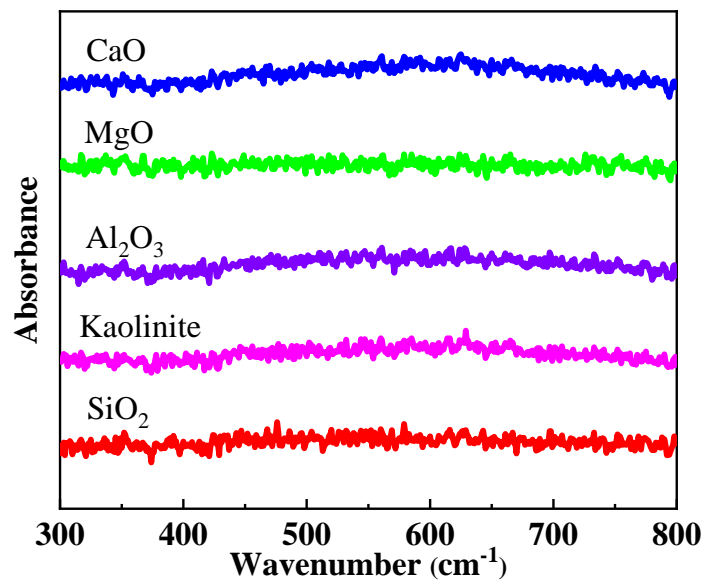

**Figure S1.** The UV-vis light absorption spectra of SiO<sub>2</sub>, kaolinite, Al<sub>2</sub>O<sub>3</sub>, MgO and CaO.

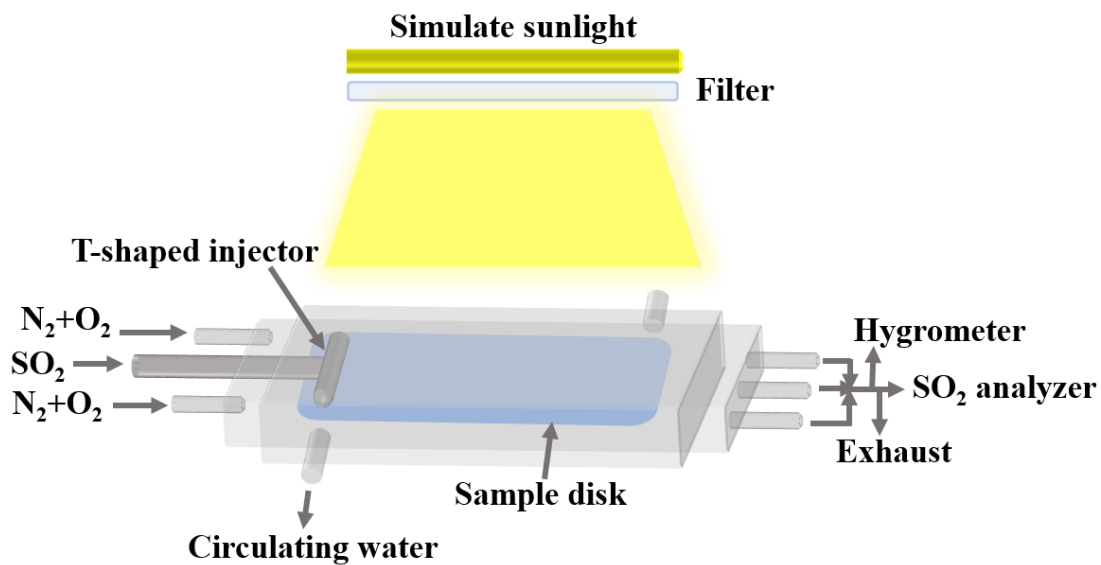

**Figure S2.** Diagram of the rectangular flow reactor.

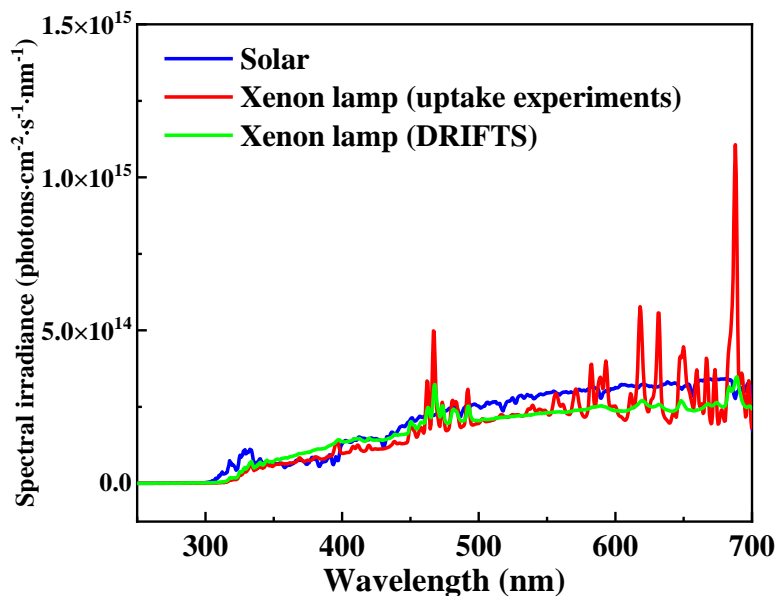

**Figure S3.** The spectral irradiance of the xenon lamp for SO<sub>2</sub> uptake and DRIFTS experiments and the solar for the 48° solar zenith clear sky at Shenyang (41.45N, 123.25E) on June 6<sup>th</sup>, 2022, at 12:00 local time.

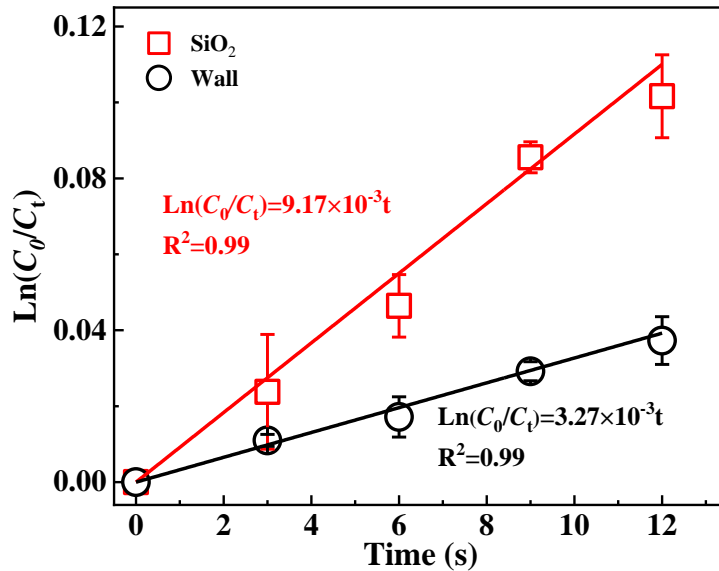

**Figure S4.** Determination of the linearity of  $\ln(C_0/C_t)$  against the reaction time by varying the length of SiO<sub>2</sub> coating (red) and the blank reactor (black) contacting with SO<sub>2</sub>. Reaction conditions: SiO<sub>2</sub> mass of 0.2 g, irradiation intensity of 250 W m<sup>-2</sup>, temperature of 298 K, RH of 40% and O<sub>2</sub> content of 20%.

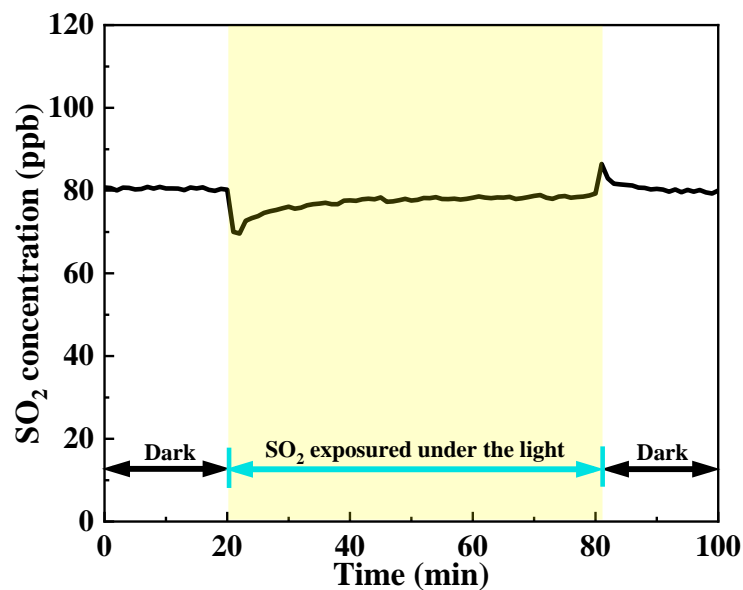

**Figure S5.** The temporal variation of SO<sub>2</sub> in blank experiments under irradiation. Reaction conditions: blank flow reactor, irradiation intensity of 250 W m<sup>-2</sup>, RH of 40%, temperature of 298 K, and O<sub>2</sub> content of 20%.

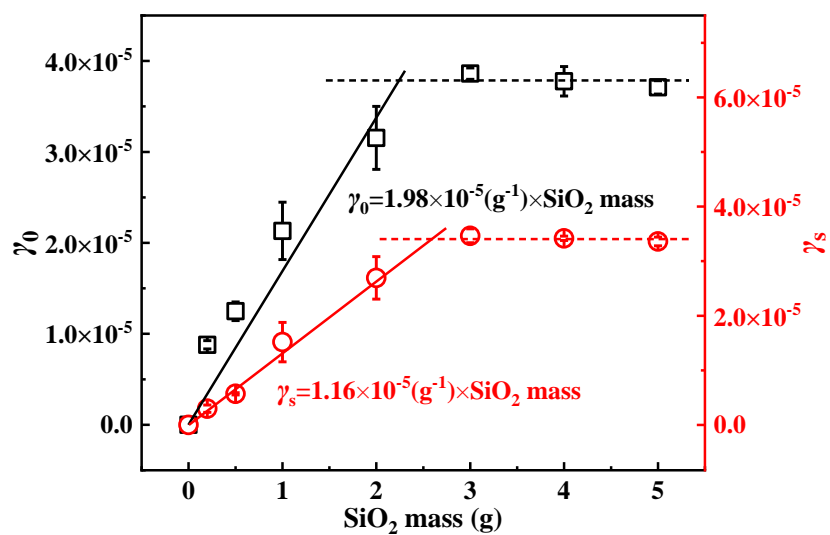

**Figure S6.** Initial uptake coefficients and steady-state uptake coefficients of SO<sub>2</sub> as a function of the SiO<sub>2</sub> mass.

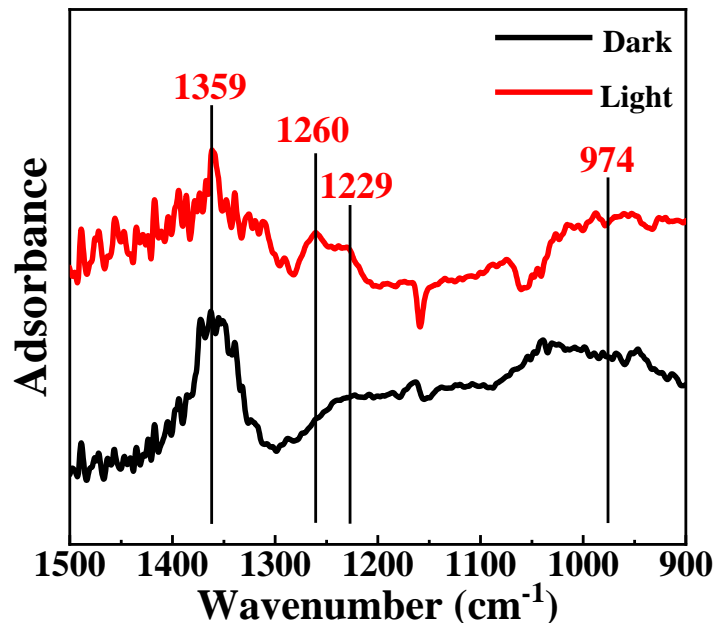

**Figure S7.** *In situ* DRIFTS spectra of SiO<sub>2</sub> in the range of 1500–900 cm<sup>-1</sup> during the uptake process of SO<sub>2</sub> (2 ppm) for 600 min in the dark and under irradiation.

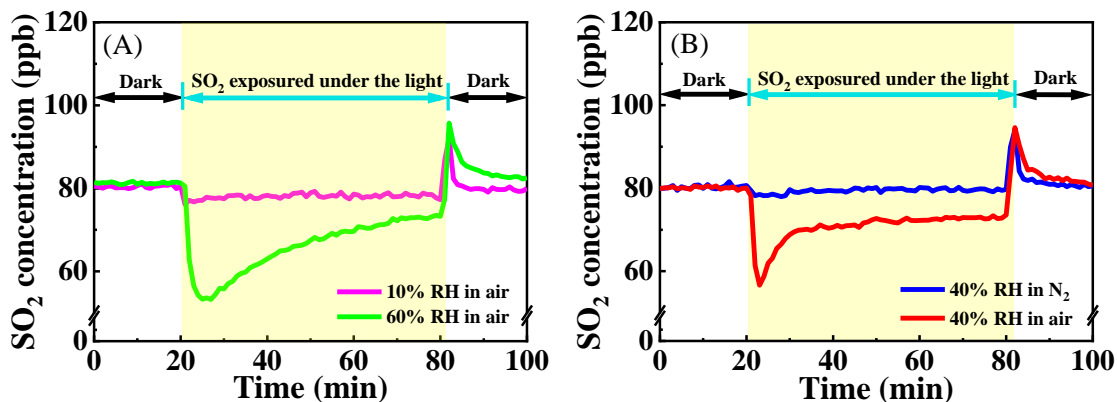

**Figure S8.** (A) Temporal variations of the SO<sub>2</sub> concentration on SiO<sub>2</sub> at different RHs. (B) Temporal variations of the SO<sub>2</sub> concentration on SiO<sub>2</sub> in N<sub>2</sub> and air. The background changes of the SO<sub>2</sub> concentration in the blank reactor have been deducted. Reaction conditions: SiO<sub>2</sub> mass of 0.2 g, irradiation intensity of 250 W m<sup>-2</sup>, temperature of 298 K, O<sub>2</sub> content of 20% for (A) and RH of 40% for (B).

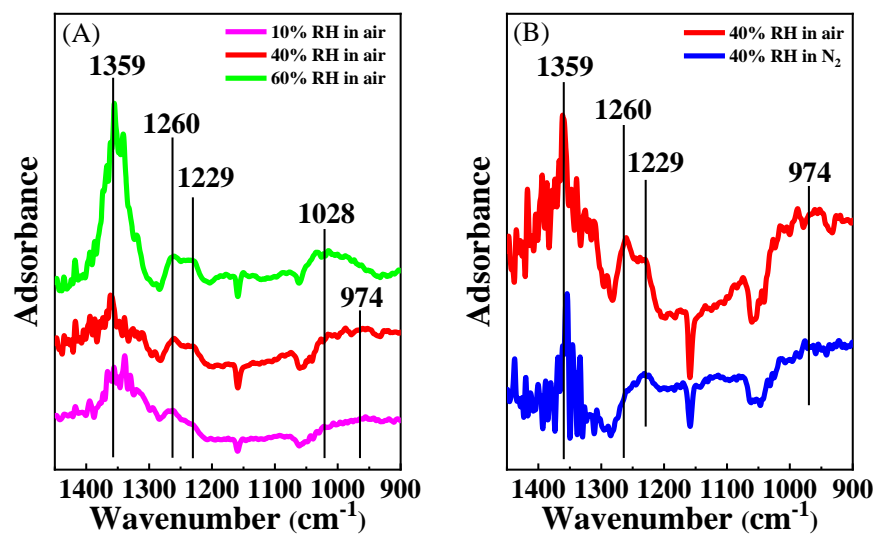

**Figure S9.** *In situ* DRIFTS spectra of SiO<sub>2</sub> during the uptake process of SO<sub>2</sub> (2 ppm) under different RHs (A) and O<sub>2</sub> contents (B).

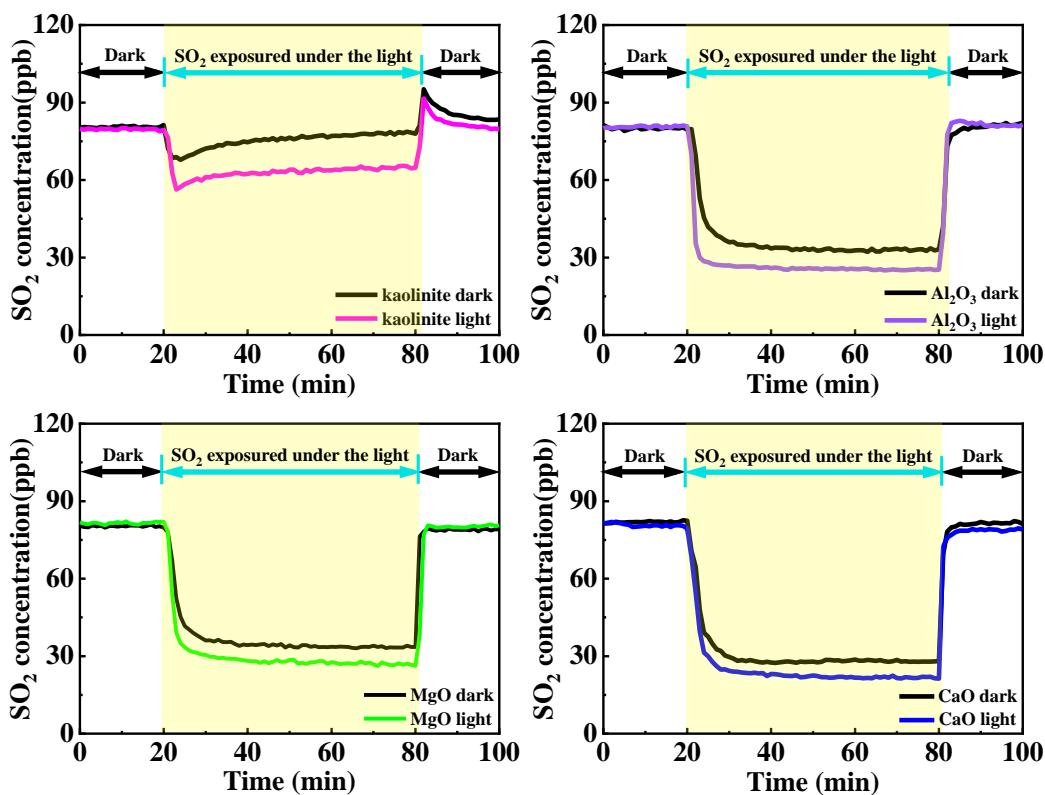

**Figure S10.** Temporal variations of the SO<sub>2</sub> concentration on kaolinite, Al<sub>2</sub>O<sub>3</sub>, MgO and CaO.

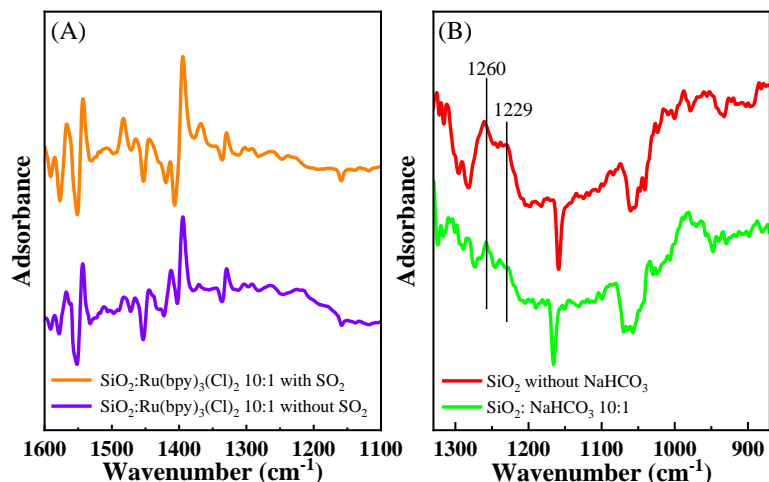

**Figure S11.** (A) *In situ* DRIFTS spectra on the surface of SiO<sub>2</sub> mixed with Ru(bpy)<sub>3</sub>(Cl)<sub>2</sub> in the absence (purple line) and presence of SO<sub>2</sub> (yellow line) for 300 min. (B) *In situ* DRIFTS spectra during the uptake process of SO<sub>2</sub> (2 ppm) in the absence (red line) and presence of NaHCO<sub>3</sub> (green line) for 300 min.

**Table S1.** SO<sub>2</sub> uptake coefficients and sulfate formation rates in different pathways.

| Pathways                                          | Light sources | SO <sub>2</sub> uptake coefficients | Sulfate formation rates (μg m <sup>-3</sup> h <sup>-1</sup> ) |
|---------------------------------------------------|---------------|-------------------------------------|---------------------------------------------------------------|
| •OH(Xue et al., 2016)                             | -             | -                                   | 0.001–0.1                                                     |
| NO <sub>2</sub> (Cheng et al., 2016)              | -             | -                                   | 0.01–10                                                       |
| H <sub>2</sub> O <sub>2</sub> (Liu et al., 2020a) | -             | -                                   | 0.07–3.6                                                      |
| TMI(Ye et al., 2021)                              | -             | 2.56×10 <sup>-10</sup>              | ~0.001                                                        |
| nitrate(Gen et al., 2019)                         | UV            | 7.36×10 <sup>-7</sup>               | 0.001–1                                                       |
| black carbon(Zhang et al., 2022)                  | Xenon lamp    | -                                   | 0.01–0.018                                                    |
| brown carbon(Liu et al., 2020b)                   | Xenon lamp    | 2×10 <sup>-5</sup>                  | 0.19                                                          |
| PM <sub>2.5</sub> (Zhang et al., 2020)            | UV            | 4.82×10 <sup>-7</sup>               | 0.016                                                         |
| non-photoactive mineral dust                      | Xenon lamp    | <sup>a</sup> 2.22×10 <sup>-6</sup>  | 2.15                                                          |

<sup>a</sup>This SO<sub>2</sub> uptake coefficient was calculated accounting for the mass fraction of SiO<sub>2</sub>, Al<sub>2</sub>O<sub>3</sub>, MgO, and CaO in mineral dust, which was 60%, 12.5%, 4% and 6.5%, respectively.

## Reference

- Cheng, Y., Zheng, G., Wei, C., Mu, Q., Zheng, B., Wang, Z., Gao, M., Zhang, Q., He, K., Carmichael, G., Pöschl, U., and Su, H.: Reactive nitrogen chemistry in aerosol water as a source of sulfate during haze events in China, *Sci. Adv.*, 2, 1601530-1601540, <https://doi.org/10.1126/sciadv.1601530>, 2016.
- Gen, M., Zhang, R., Huang, D., Li, Y., and Chan, C.: Heterogeneous oxidation of SO<sub>2</sub> in sulfate production during nitrate photolysis at 300 nm: Effect of pH, relative humidity, irradiation intensity, and the presence of organic compounds, *Environ. Sci. Technol.*, 53, 8757-8766, <https://doi.org/10.1021/acs.est.9b01623>, 2019.
- Liu, T., Clegg, S., and Abbatt, J.: Fast oxidation of sulfur dioxide by hydrogen peroxide in deliquesced aerosol particles, *Proc. Natl. Acad. Sci. U. S. A.*, 117, 1354-1359, <https://doi.org/10.1073/pnas.1916401117>, 2020a.
- Liu, Y., Wang, T., Fang, X., Deng, Y., Cheng, H., Bacha, A. U., Nabi, I., and Zhang, L.: Brown carbon: An underlying driving force for rapid atmospheric sulfate formation and haze event, *Sci. Total. Environ.*, 734, 139415-139424, <https://doi.org/10.1016/j.scitotenv.2020.139415>, 2020b.
- Xue, J., Yuan, Z., Griffith, S. M., Yu, X., Lau, A. K., and Yu, J. Z.: Sulfate formation enhanced by a cocktail of high NO<sub>x</sub>, SO<sub>2</sub>, particulate matter, and droplet pH during haze-fog events in megacities in china: An observation-based modeling investigation, *Environ. Sci. Technol.*, 50, 7325-7334, <https://doi.org/10.1021/acs.est.6b00768>, 2016.
- Ye, C., Chen, H., Hoffmann, E. H., Mettke, P., Tilgner, A., He, L., Mutzel, A., Brüggemann, M., Poulain, L., Schaefer, T., Heinold, B., Ma, Z., Liu, P., Xue, C., Zhao, X., Zhang, C., Zhang, F., Sun, H., Li, Q., Wang, L., Yang, X., Wang, J., Liu, C., Xing, C., Mu, Y., Chen, J., and Herrmann, H.: Particle-phase photoreactions of HULIS and TMI<sub>s</sub> establish a strong source of H<sub>2</sub>O<sub>2</sub> and particulate sulfate in the winter north china plain, *Environ. Sci. Technol.*, 55, 7818-7830, <https://doi.org/10.1021/acs.est.1c00561>, 2021.
- Zhang, P., Chen, T., Ma, Q., Chu, B., Wang, Y., Mu, Y., Yu, Y., and He, H.: Diesel soot photooxidation enhances the heterogeneous formation of H<sub>2</sub>SO<sub>4</sub>, *Nat. Commun.*, 13, 5364-5372, <https://doi.org/10.1038/s41467-022-33120-3>, 2022.
- Zhang, Y., Bao, F., Li, M., Xia, H., Huang, D., Chen, C., and Zhao, J.: Photoinduced uptake and oxidation of SO<sub>2</sub> on Beijing urban PM<sub>2.5</sub>, *Environ. Sci. Technol.*, 54, 14868-14876, <https://doi.org/10.1021/acs.est.0c01532>, 2020.
